# Supplementary material
Source: MDPI journal article supplement (https://www.mdpi.com/2076-3417/10/14/4732)
Supplement: s1 [file s1]

# Salinomycin Treatment Specifically Inhibits Cell Proliferation of Cancer Stem Cells Revealed by Longitudinal Single Cell Tracking in Combination with Fluorescence Microscopy

Sofia Kamlund <sup>1,2</sup>, Birgit Janicke <sup>2</sup>, Kersti Alm <sup>2</sup> and Stina Oredsson <sup>1,\*</sup>

<sup>1</sup> Department of Biology, Lund University, Lund 223 62, Sweden; [sofia.kamlund@biol.lu.se](mailto:sofia.kamlund@biol.lu.se) (S.K.)

<sup>2</sup> Phase Holographic Imaging AB, Lund 221 04, Sweden; [birgit.janicke@phiab.se](mailto:birgit.janicke@phiab.se) (B.J.); [kersti.alm@phiab.se](mailto:kersti.alm@phiab.se) (K.A.)

\* Correspondence: [stina.oredsson@biol.lu.se](mailto:stina.oredsson@biol.lu.se) (S.O.)

Received: 1 June 2020; Accepted: 6 July 2020; Published: data

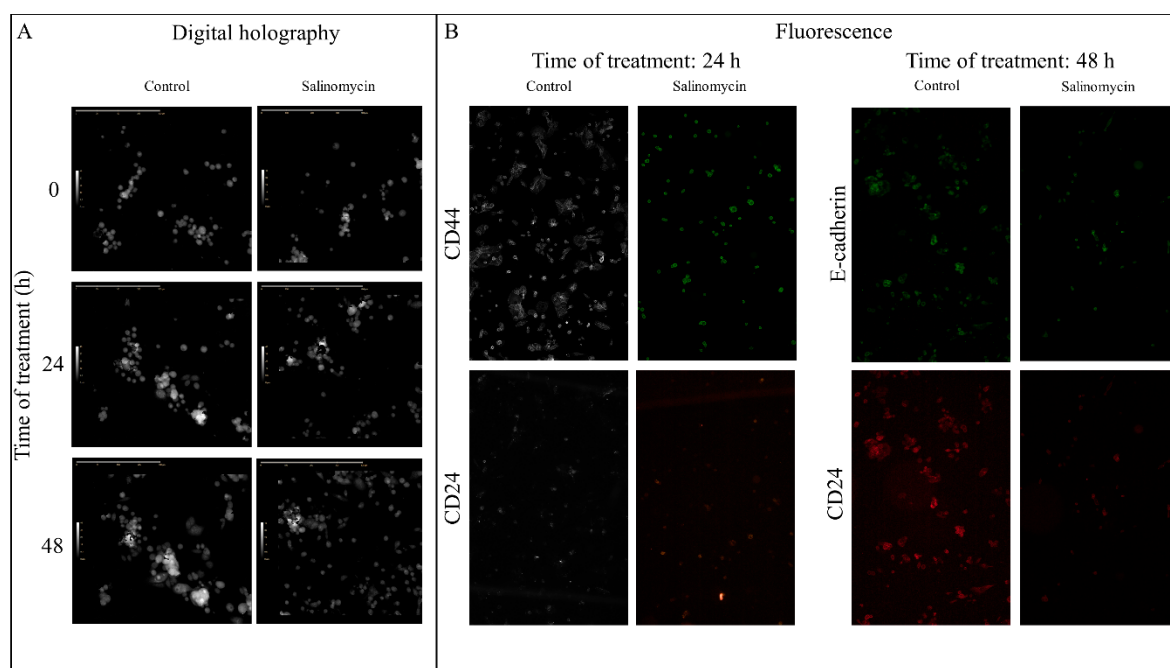

**Figure S1.** Representative images from DHM time-lapses and fluorescence. (A) Images from time-point 0, 24 and 48 h of a representative DHM time-lapse of JIMT-1 cells in the absence (control) or presence of 0.5  $\mu$ M salinomycin. The salinomycin was added immediately before the start of the time-lapse. The scale bar on top represents 300  $\mu$ m for control and 400  $\mu$ m in salinomycin-treated samples, and the scalebar to the left represents the optical thickness 0–46  $\mu$ m in control and 0–48  $\mu$ m in salinomycin-treated samples. (B) Fluorescence images of samples fixed after DHM imaging. The cells were labelled with anti-CD24-PE and anti-CD44-FITC or anti-CD24-PE and anti-E-cadherin-Alexa Flour 488 after 24 or 48 h of treatment.

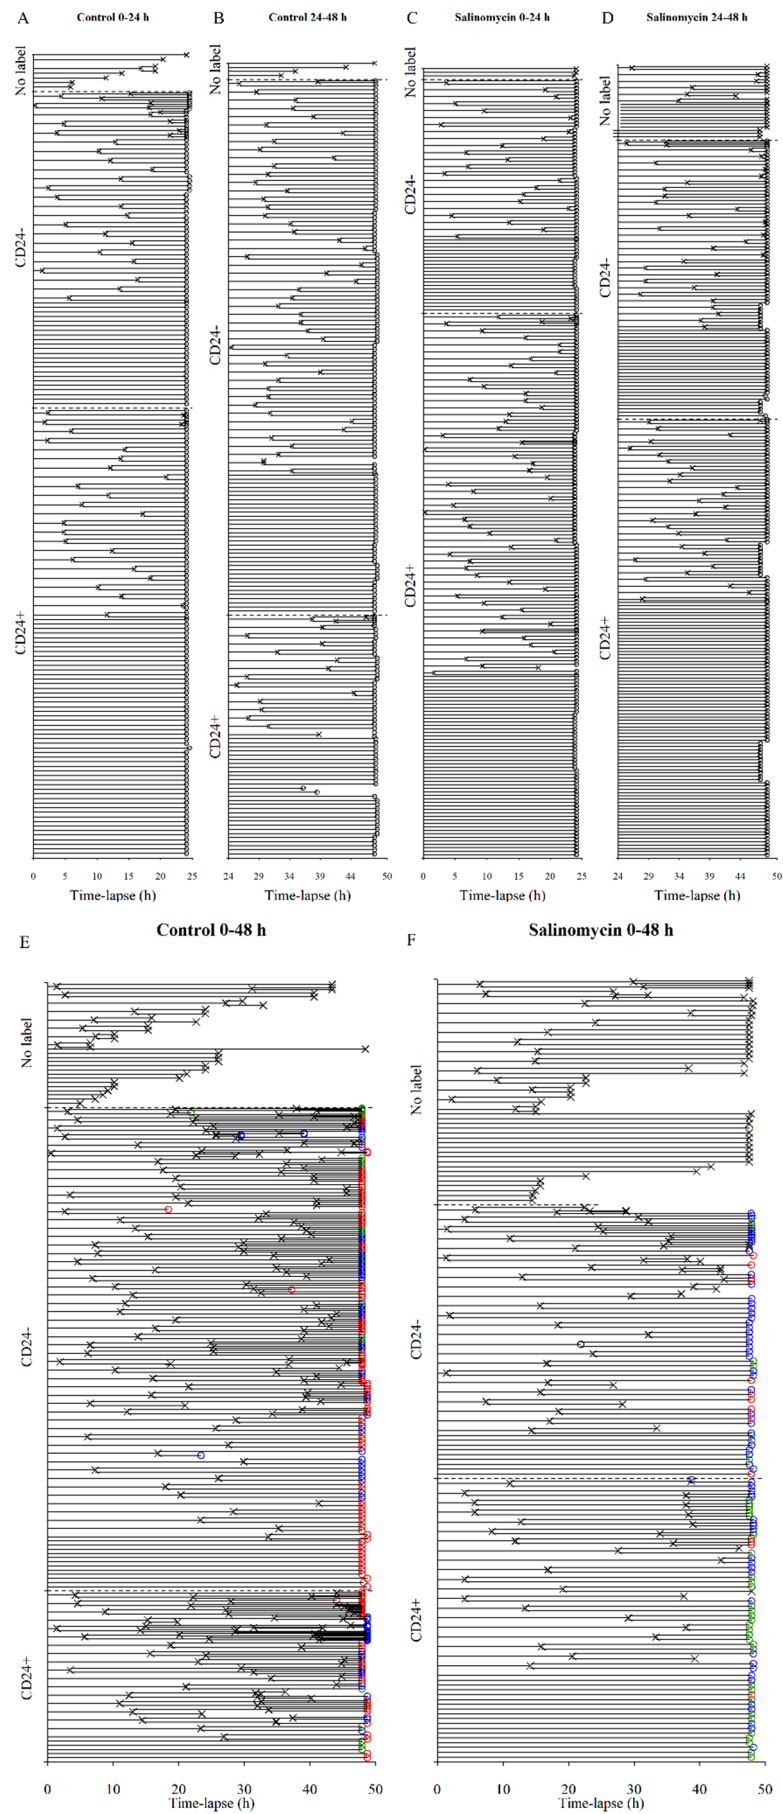

**Figure S2.** Cell family trees of JIMT-1 cells tracked through time-lapses of digital holographic images. Images were acquired every 15 min for 24 (A-D) or 48 (E, F) hours. Salinomycin (0.5  $\mu$ M) was added immediately before the start of the time-lapse (C, F) or 24 h before the start of the time-lapse (D). Immediately after the image acquisition the cells were fixed and labelled with anti-CD24-PE and anti-CD44-FITC (A-D) or anti-CD24-PE and anti-E-cadherin-Alexa Fluor 488 (E, F). The tracked cells were matched to their expression of the fluorescent markers after tracking. The CD24-expression was characterized as positive or negative. The cell trees are grouped according to their CD24-expression, divided by a dashed line. The expression of E-cadherin is characterized as low (red), mid (blue) or high (green). No label means tracked cells that escaped the frame before the fixation and therefore don't have any known expression. X denotes an unknown expression, either due to escape out of frame or due to division during the time-lapse.

**Table S1.** Interpretation of number of cell divisions seen in Figure S2 in relation to labelling.

| Control 0-24 h      |              |                   |                   |
|---------------------|--------------|-------------------|-------------------|
| Number of divisions | No labelling | CD24 <sup>-</sup> | CD24 <sup>+</sup> |
| 0                   | 6            | 23                | 52                |
| 1                   | 1            | 18                | 21                |
| 2                   | 0            | 5                 | 2                 |

  

| Control 24-48 h     |              |                   |                   |
|---------------------|--------------|-------------------|-------------------|
| Number of divisions | No labelling | CD24 <sup>-</sup> | CD24 <sup>+</sup> |
| 0                   | 4            | 34                | 28                |
| 1                   | 0            | 47                | 14                |
| 2                   | 0            | 1                 | 1                 |

  

| Salinomycin 0-24 h  |              |                   |                   |
|---------------------|--------------|-------------------|-------------------|
| Number of divisions | No labelling | CD24 <sup>-</sup> | CD24 <sup>+</sup> |
| 0                   | 3            | 21                | 52                |
| 1                   | 0            | 23                | 50                |
| 2                   | 0            | 0                 | 2                 |

  

| Salinomycin 24-48 h |              |                   |                   |
|---------------------|--------------|-------------------|-------------------|
| Number of divisions | No labelling | CD24 <sup>-</sup> | CD24 <sup>+</sup> |
| 0                   | 11           | 27                | 78                |
| 1                   | 3            | 27                | 27                |
| 2                   | 3            | 1                 | 1                 |

  

| Control 0-48 h      |              |           |                   |            |   |                   |            |
|---------------------|--------------|-----------|-------------------|------------|---|-------------------|------------|
| Number of divisions | No labelling |           | CD24 <sup>-</sup> |            |   | CD24 <sup>+</sup> |            |
|                     |              | E-cad low | E-cad mid         | E-cad high |   | E-cad low         | E-cad high |
| 0                   | 14           | 12        | 0                 | 0          | 2 | 0                 | 3          |
| 1                   | 6            | 9         | 6                 | 0          | 1 | 1                 | 0          |
| 2                   | 2            | 18        | 10                | 3          | 6 | 4                 | 0          |
| 3                   | 0            | 3         | 2                 | 2          | 3 | 3                 | 0          |

  

| Salinomycin 0-48 h  |              |           |                   |            |   |                   |            |
|---------------------|--------------|-----------|-------------------|------------|---|-------------------|------------|
| Number of divisions | No labelling |           | CD24 <sup>-</sup> |            |   | CD24 <sup>+</sup> |            |
|                     |              | E-cad low | E-cad mid         | E-cad high |   | E-cad low         | E-cad high |
| 0                   | 20           | 1         | 6                 | 2          | 1 | 7                 | 10         |
| 1                   | 12           | 4         | 11                | 1          | 0 | 5                 | 8          |
| 2                   | 2            | 3         | 4                 | 1          | 1 | 3                 | 3          |
| 3                   | 0            | 0         | 0                 | 0          | 0 | 0                 | 0          |

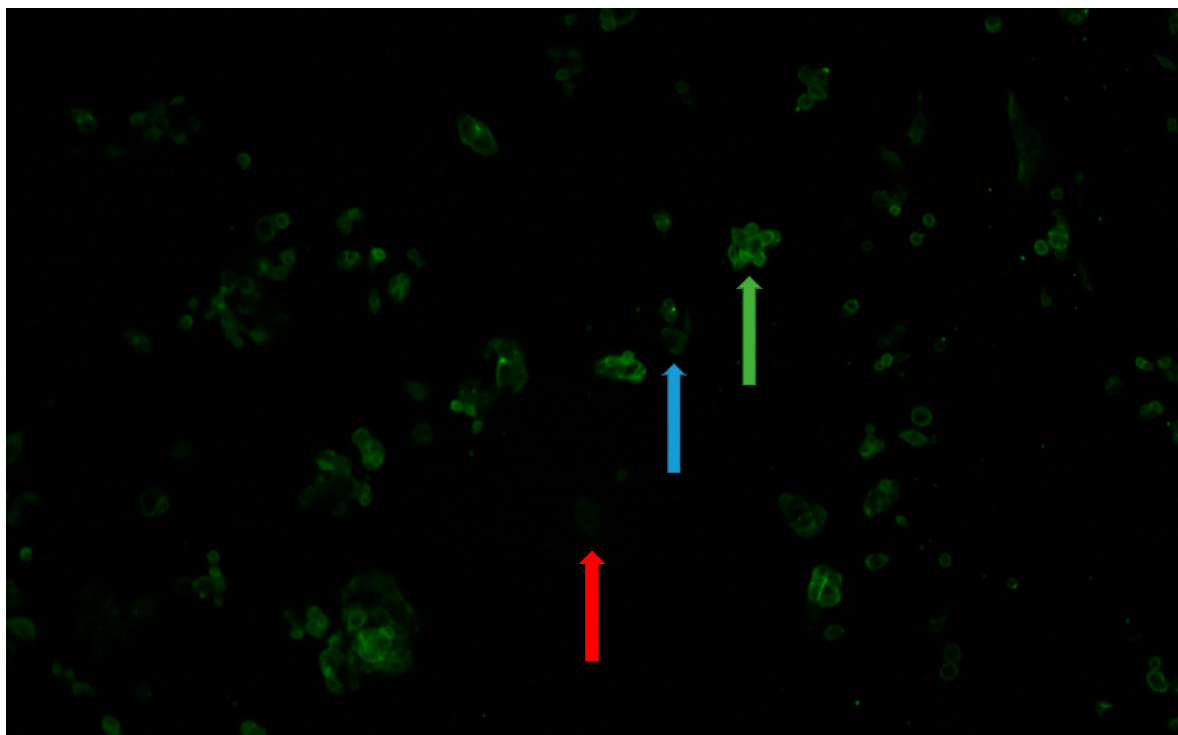

**Figure S3.** Fluorescence image displaying the visual evaluation of E-cadherin -labeled cells as low (red arrow), mid (blue arrow) or high (green arrow). The cell with the red arrow is barely visible on a computer screen.
